# Supplementary material for: Facile synthesis of three-dimensional Mn3O4hierarchical microstructures and their application in the degradation of methylene blue
Source: Royal Society of Chemistry journal article supplement (doi:10.1039/c4ta05493h), 2014-12-12
Supplement: c4ta05493h1.pdf [file c4ta05493h1.pdf]

## Supplementary Information

### Facile Synthesis of Three-Dimensional $\text{Mn}_3\text{O}_4$ Hierarchical Microstructures and Their Application in the Degradation of Methylene Blue

Yuli Wang,<sup>a</sup> Ling Zhu,<sup>a</sup> Xing Yang,<sup>b</sup> Erlei Shao,<sup>b</sup> Xiaoyong Deng,<sup>\*b</sup> Ning Liu,<sup>a</sup>  
Minghong Wu<sup>\*a</sup>

<sup>a</sup> Shanghai Applied Radiation Institute, School of Environmental and Chemical Engineering, Shanghai University, Shanghai 200444, P. R. China; E-mail: mhwu@shu.edu.cn

<sup>b</sup> Institute of Nanochemistry and Nanobiology, Shanghai University, Shanghai 200444, P. R. China; E-mail: xydeng@shu.edu.cn

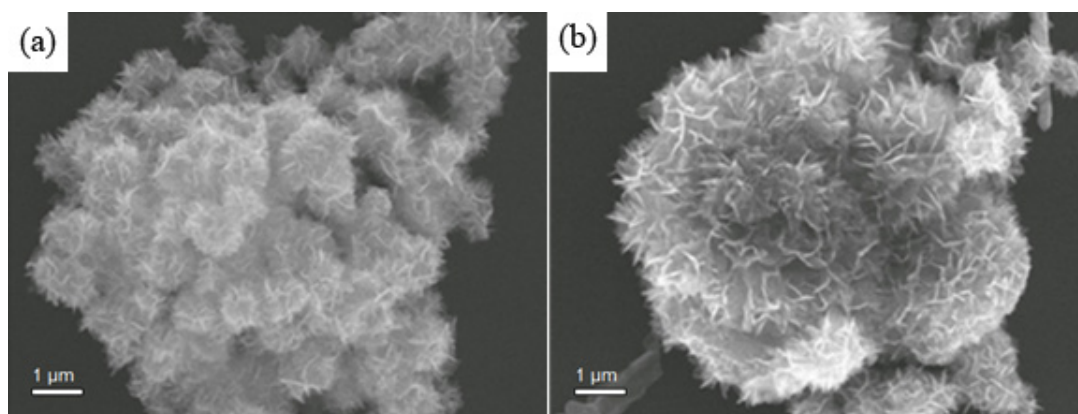

Fig. S1 SEM images of the prepared 3D flower-like  $\text{Mn}_3\text{O}_4$  nanostructures before and after calcination at 400 °C for 4 h

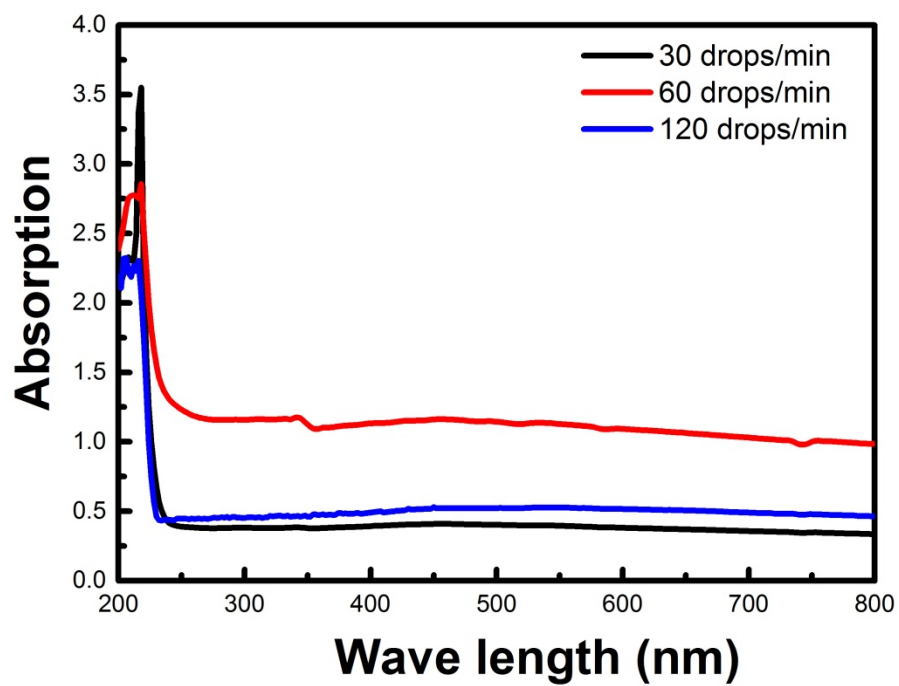

Fig. S2 The UV-Vis spectra of as-prepared Mn<sub>3</sub>O<sub>4</sub> solution with deferent speed of adding NaOH
